# Supplementary material
Source: PubMed Central journal article supplement (PMC8185603)
Supplement: NIHPP2021.04.11.439398V2-supplement-1.pdf [file NIHPP2021.04.11.439398V2-supplement-1.pdf]

770 **SUPPLEMENTARY MATERIAL**

771

772 **SUPPLEMENTAL TABLES**

773

774 **Table S1.** Primary and secondary antibodies used in this study.

| Primary antibodies          | Company           | Catalog #   | Type                         |
|-----------------------------|-------------------|-------------|------------------------------|
| ACE2                        | R&D Systems       | AF3437      | goat polyclonal              |
| ACE2                        | ABclonal          | A4612       | rabbit monoclonal            |
| Cathepsin B                 | R&D Systems       | AF965       | goat polyclonal              |
| Cathepsin L                 | R&D Systems       | AF1515      | goat polyclonal              |
| CHAT                        | Proteintech       | 24418-1-AP  | rabbit polyclonal            |
| GnRH1                       | Proteintech       | 26950-1-AP  | rabbit polyclonal            |
| OMP                         | WAKO              | 544-10001   | goat polyclonal              |
| TMPRSS2                     | Novus Biologicals | NBP3-00492  | rabbit monoclonal            |
| TMPRSS2                     | Abcam             | ab242384    | rabbit monoclonal            |
| TMPRSS2                     | St John's         | STJ11102428 | rabbit monoclonal            |
| <b>Secondary antibodies</b> |                   |             | <b>Fluorescent conjugate</b> |
| donkey anti-rabbit          | Abcam             | ab15006     | Alexa Fluor 488              |
| donkey anti-goat            | Abcam             | ab150136    | Alexa Fluor 594              |
| horse anti-rabbit           | Vector            | DI-1094     | Alexa Fluor 594              |
| horse anti-goat             | Vector            | DI-3088     | Alexa Fluor 488              |

775

776 Abbreviations: ACE2, angiotensin converting enzyme 2; CHAT, choline acetyltransferase; GnRH1,  
777 gonadotropin releasing hormone 1; OMP, olfactory marker protein; TMPRSS2, transmembrane  
778 protease serine 2.  
779

780 **TABLE S2.** Numbers of animals, sections, and numbers of neurons double-labeled for  
781 nervus terminalis markers (GnRH, CHAT) and ACE2.

|                      | # of sections | # of GnRH neurons | # of GnRH and ACE2 | %                  |
|----------------------|---------------|-------------------|--------------------|--------------------|
| <b>GnRH and ACE2</b> |               |                   |                    |                    |
| Mouse 1              | 16            | 25                | 23                 | 92.0               |
| Mouse 2              | 21            | 30                | 27                 | 90.0               |
| Mouse 3              | 15            | 21                | 19                 | 90.5               |
| Mouse 4              | 11            | 10                | 8                  | 80.0               |
| Mouse 5              | 22            | 33                | 30                 | 90.9               |
| <b>Sum/mean</b>      | <b>85</b>     | <b>119</b>        | <b>107</b>         | <b>89.9</b>        |
| <b>CHAT and ACE2</b> |               |                   |                    |                    |
| Mouse 1              | 21            | 20                | 2                  | 10.0               |
| Mouse 2              | 15            | 18                | 2                  | 11.1               |
| Mouse 3              | 18            | 14                | 1                  | 7.1                |
| <b>Sum/mean</b>      | <b>54</b>     | <b>52</b>         | <b>5</b>           | <b>9.4</b>         |
| <b>t-test</b>        |               |                   |                    | <b>p&lt;0.0001</b> |

782

783 **SUPPLEMENTAL FIGURES**

784

785

786

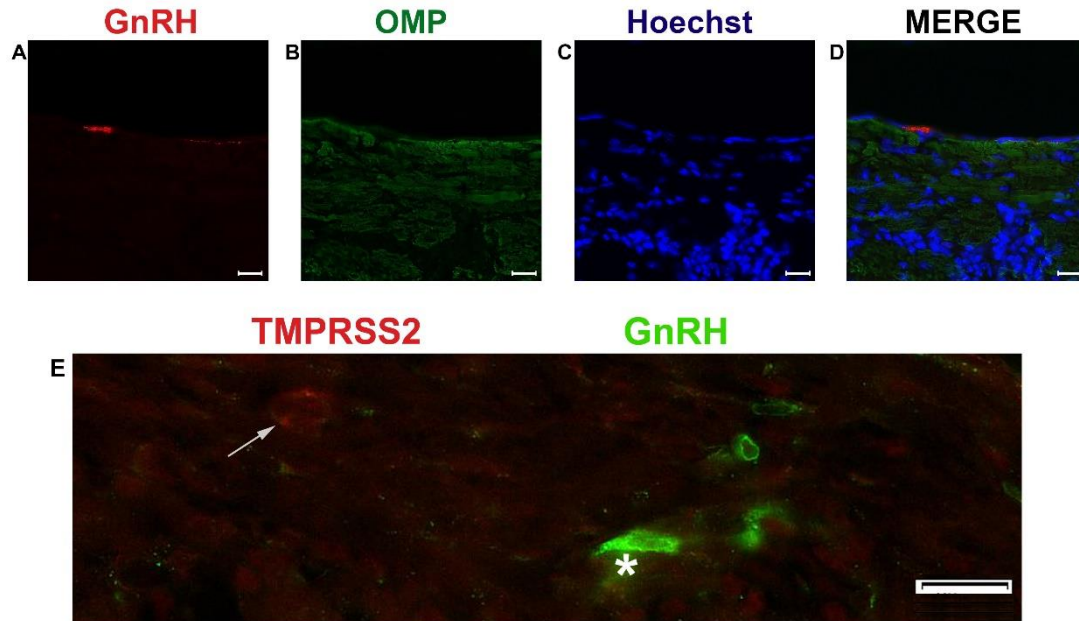

787

788

789 **Fig. S1.** Examples of double immunofluorescent labeling of nervus terminalis  
790 neurons with the markers GnRH and olfactory marker protein (OMP) (**A-D**), and  
791 GnRH and TMPRSS2 (**E**). Label for GnRH (**A**) and OMP (**B**) in the medial region  
792 adjacent to the olfactory bulbs as indicated in Fig. 1. Nuclei are stained with Hoechst  
793 33258 (**C**) and the merged image is shown in (**D**). GnRH-labeled cells were never  
794 labeled for OMP in this region. (**E**) GnRH-labeled nervus terminalis neurons (one  
795 neuron indicated with the white asterisk) did not co-localize with cells positive for  
796 TMPRSS2 (white arrow). Scale bars: 20  $\mu$ m.
